# Supplementary material for: Identification of Wheat Ideotype under Multiple Abiotic Stresses and Complex Environmental Interplays by Multivariate Analysis Techniques
Source: MDPI journal article supplement (doi:10.3390/plants12203540), 2023-10-11
Supplement: s1 [file s1]

**Table S1.** Names and pedigree of the 20 bread wheat genotypes (6 cultivars and 14 doubled haploid lines (DHLs)) used in this study.

| Name                  | Pedigree                                                                      |
|-----------------------|-------------------------------------------------------------------------------|
| Gemmeiza-9            | Ald“s”/Huac//CMH74 .630/SxCGM 4583 -5GM- 1GM- OGM                             |
| Gemmeiza-12           | OTUS/3/SARA/THB//VEEMSS97Y00227S-5y-010M-010Y-010M-2Y-1M-0Y-OGM               |
| Sakha-93              | Sakha 92/TR810328 S8871-IS-2S-IS-0S                                           |
| Misr1                 | OASSIS / SKAUZ//4*BCN/3/2*PATOR CMSS00Y01881T-050M-030Y-030M-030WGY-33M-0Y-0S |
| Pavone-76             | Vcm//Cno/7C/3/Kal/Bb                                                          |
| KSU106                | Barouk/R1474-75-3-53-3-3                                                      |
| DHLs (23,25)          | Derived from the cross (Line-115 × Gemmeiza-7) (El-Hennawy et al. 2011)       |
| DHLs (5,7,8,11)       | Derived from the cross (Line-115 × Giza-164) (El-Hennawy et al. 2011)         |
| DHLs (12,14,15,26,29) | Derived from the cross (Gemmeiza-7× Giza-164) (El-Hennawy et al. 2011)        |
| DHLs (1,2, 6)         | Derived from the cross (Giza-164× Giza-168) (El-Hennawy et al. 2011)          |

**Table S2.** Details of genotype codes and names of 20 bread wheat genotypes (6 cultivars and 14 doubled haploid lines (DHLs)) used in this study

| Genotypes   | Genotype code | Genotypes | Genotype code |
|-------------|---------------|-----------|---------------|
| DHL12       | G1            | DHL14     | G11           |
| DHL02       | G2            | DHL29     | G12           |
| DHL25       | G3            | DHL15     | G13           |
| DHL07       | G4            | DHL06     | G14           |
| DHL26       | G5            | Misr1     | G15           |
| Gemmeiza-9  | G6            | DHL05     | G16           |
| DHL11       | G7            | DHL23     | G17           |
| KSU106      | G8            | Sakha-93  | G18           |
| Gemmeiza-12 | G9            | Pavone-76 | G19           |
| DHL01       | G10           | DHL08     | G20           |

**Table S3.** Monthly agro-climatological data at the experimental location during the growing seasons.

| Parameters<br>Months | Precipitation (mm) |      |      | Temperature (°C) |       |       |         |       |       |         |       |       | Relative Humidity (%) |       |       |
|----------------------|--------------------|------|------|------------------|-------|-------|---------|-------|-------|---------|-------|-------|-----------------------|-------|-------|
|                      |                    |      |      | Maximum          |       |       | Minimum |       |       | Average |       |       |                       |       |       |
|                      | S1                 | S2   | S3   | S1               | S2    | S3    | S1      | S2    | S3    | S1      | S2    | S3    | S1                    | S2    | S3    |
| November             | 0.31               | 0.27 | 0.17 | 35.37            | 34.82 | 28.07 | 5.05    | 5.84  | 16.37 | 20.21   | 20.33 | 22.03 | 41.69                 | 41.21 | 41.34 |
| December             | 0.02               | 0.10 | 0.05 | 27.40            | 27.46 | 21.84 | 4.01    | 4.95  | 10.58 | 15.71   | 16.21 | 16.10 | 45.31                 | 44.36 | 55.45 |
| January              | 0.10               | 0.05 | 0.10 | 29.34            | 28.65 | 19.87 | 1.23    | 2.01  | 8.32  | 15.29   | 15.33 | 14.06 | 40.19                 | 40.68 | 47.37 |
| February             | 0.00               | 0.00 | 0.00 | 33.79            | 32.43 | 24.66 | 1.21    | 2.08  | 11.62 | 17.50   | 17.26 | 18.19 | 28.44                 | 29.26 | 32.89 |
| March                | 0.00               | 0.00 | 0.00 | 35.80            | 36.19 | 28.65 | 6.98    | 7.01  | 15.77 | 21.39   | 21.60 | 22.41 | 25.69                 | 26.02 | 28.79 |
| April                | 0.98               | 1.02 | 0.98 | 39.91            | 38.63 | 33.70 | 14.13   | 15.11 | 21.53 | 27.02   | 26.87 | 27.73 | 31.50                 | 30.24 | 31.38 |
| May                  | 0.01               | 0.00 | 0.01 | 42.91            | 41.77 | 38.97 | 19.21   | 19.94 | 24.87 | 31.06   | 30.86 | 32.37 | 17.69                 | 17.05 | 19.69 |

S1, Season 2018/2019; S2, Season 2019/2020, S3, Season 2020/2021.
